# Supplementary material for: Postnatal Changes in the Expression Pattern of the Imprinted Signalling Protein XLαs Underlie the Changing Phenotype of Deficient Mice
Source: PLOS journal article supplement (doi:10.1371/journal.pone.0029753), 2012-01-11
Supplement: S3 (10.1371/journal.pone.0029753.s003) [file journal.pone.0029753.s003]

**Figure S3**

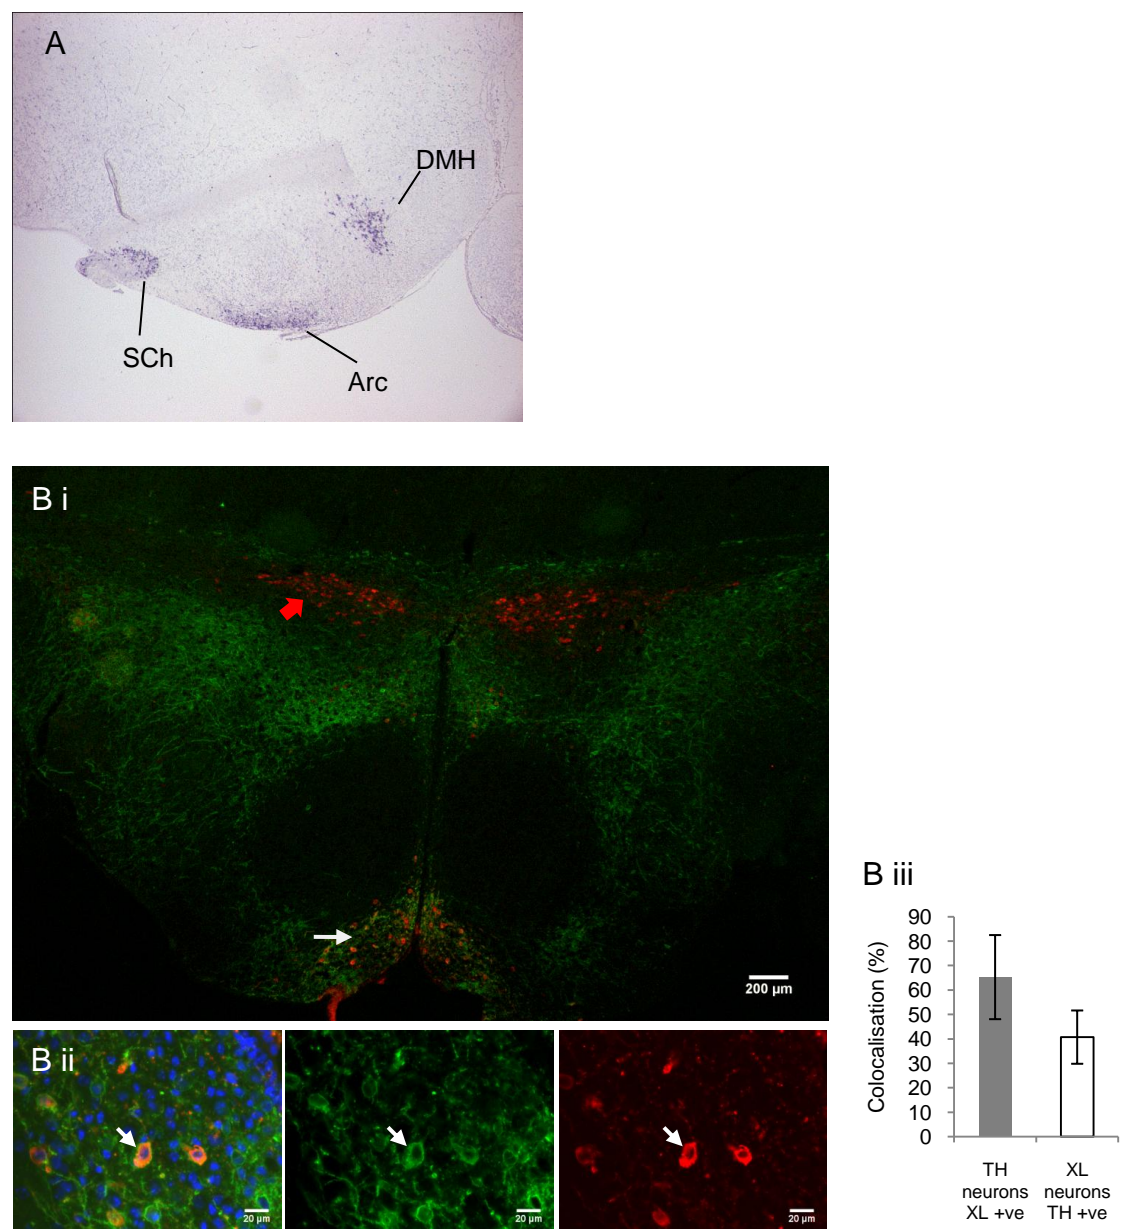

**Figure S3. Expression and co-localisation of *Gnasxl* in the hypothalamus.** (A) Expression of *Gnasxl* in the hypothalamic arcuate nucleus at postnatal day 4. An *in situ* hybridisation of a sagittal brain section with a Digoxigenin-labelled RNA probe is shown. (B) XLas expression in A12 dopaminergic neurons of the arcuate nucleus of adult mice. (B i) Overview; XLas in green; Tyrosine hydroxylase (TH) in red. White arrow = A12 dopamine neuron group of the arcuate nucleus. Red arrow = A13 dopaminergic cells of the zona incerta (no co-localisation). (B ii) Higher magnification showing co-localisation in a portion of arcuate neurons. (B iii) ~65 % of TH positive neurons in the A12 dopaminergic cell group showed XLas expression (n =2).
